# Supplementary material for: Mesenchymal stem cells alleviate sepsis-induced acute lung injury by blocking neutrophil extracellular traps formation and inhibiting ferroptosis in rats
Source: PeerJ. 2024 Jan 29;12:e16748. doi: 10.7717/peerj.16748 (PMC10832623; doi:10.7717/peerj.16748)
Supplement: Supplemental Information 2 [file peerj-12-16748-s002.xlsx]

## Sheet: Fig.A-B
histopathological score	Sham	CLP						Sham					CLP
	1.5	8.25
	1.5	9
	2	11.5
	1.5
	1
	2

## Sheet: Fig.C
W/D	SHAM	CLP
	3.34653	5.13433
	3.90789	5.08064
	3.73563	4.70786
	3.775
	3.60227
	3.42222

## Sheet: Fig.D
TNF-A	SHAM	CLP	IL-6	SHAM	CLP
	119.07	196.92		57.97	85.12
	75.47	183.19		42.44	109.12
	91.07	126.8		42.55	67.12
	124.14			66.81
	111.76			64.59
	101.34			53.86

## Sheet: Fig.E-F
	Sham	CLP							Sham					CLP
	0.72	1.76
	1.09	2.18
	1.05	2.44
	1.18
	0.96
	0.86

## Sheet: Fig.G
							ACSL4
							GPX4
							FTH
							GAPDH

## Sheet: Fig.H
ACSL4		GPX4		FTH		GAPDH
1	16083.7	1	28797.5	1	27673.2	1	21251.1
2	5977.86	2	15971.3	2	9818.93	2	16672.4
3	14067.6	3	7921.59	3	4567.15	3	19749.2
4	13443.1	4	9393.17	4	12759.5	4	14432.2
5	9808.88	5	14112.3	5	16923.5	5	25731.9
6	162110	6	14700.1	6	19736.6	6	28686

## Sheet: Fig.I
GSH	Sham	CLP	MDA	Sham	CLP	Fe	Sham	CLP
	7.67	4.75096		6.07	13.46		4.39	10.81
	8.98	7.96935		6.28	7.97		5	11.9
	9.6	2.95019		2.47	11.32		4.77	7.61
	8.11			5.42			4.44
	9.08			4.29			6.4
	5.45			3.84			6.72
