# Supplementary material for: Mesenchymal stem cells alleviate sepsis-induced acute lung injury by blocking neutrophil extracellular traps formation and inhibiting ferroptosis in rats
Source: PeerJ. 2024 Jan 29;12:e16748. doi: 10.7717/peerj.16748 (PMC10832623; doi:10.7717/peerj.16748)
Supplement: Supplemental Information 3 [file peerj-12-16748-s003.xlsx]

## Sheet: Fig.A
			Sham				CLP				Fer-1

## Sheet: Fig.B
ACSL4
GPX4
FTH
GAPDH

## Sheet: Fig.C
ACSL4		GPX4		FTH		GAPDH
1	12482.4	1	8721.2	1	7621.33	1	14681.8
2	2827.91	2	8110.18	2	10469.7	2	13346
3	14906.2	3	14850.9	3	19693.2	3	14051.5
4	16020.2	4	11653.3	4	13597.3	4	14322.4
5	14865.9	5	9942.91	5	12977.9	5	15159.5
6	7126.5	6	15746.4	6	10979.9	6	15777.8
7	8434.38	7	13154.7	7	15439.6	7	17686.7
8	8188.74	8	20213	8	18794.3	8	17818
9	8935.67	9	16428.7	9	15773.9	9	19041.4

## Sheet: Fig.D
GSH	Sham	CLP	Fer-1	MDA	Sham	CLP	Fer-1	FE	Sham	CLP	Fer-1
	8.75456	3.14176	8.54029		2.70677	8.14722	3.47774		1.2944	6.39635	3.67441
	5.44754	7.12644	4.69597		3.52632	14.3724	4.16601		1.53211	6.71807	3.99429
	8.2559	4.29119	8.75381		4.47895	6.287	4.71777		1.16158	4.76187	2.1664
	7.78552		9.493		6.29202		4.6391		2.17868		2.83699
	9.29478				4.6391				0.958904
	8.3147				5.33083				1.3871

## Sheet: Fig.E-F
Histopathological Score	Sham	CLP	Fer-1					Sham				CLP				Fer-1
	2	9.75	5.75
	1.5	10	5.25
	1.5	9.67	5.75
	2		5
	2
	2

## Sheet: Fig.G
W/D	Sham	CLP	Fer-1
	3.88	5.45	4.75
	4.01	4.68	4.18
	4.23	4.35	4.7
	4.04		4.65
	4.3
	3.68

## Sheet: Fig.H
TNF-A	Sham	CLP	Fer-1	IL-6	Sham	CLP	Fer-1
	119.725	152.613	159.159		54.3849	97.02	72.7167
	73.8938	246.556	122.232		48.088	114.718	70.1592
	91.6074	194.741	105.549		47.2567	116.976	62.3249
	125.083		133.894		69.2216		69.675
	113.109				67.8613
	109.818				53.227
