# Supplementary material for: Mesenchymal stem cells alleviate sepsis-induced acute lung injury by blocking neutrophil extracellular traps formation and inhibiting ferroptosis in rats
Source: PeerJ. 2024 Jan 29;12:e16748. doi: 10.7717/peerj.16748 (PMC10832623; doi:10.7717/peerj.16748)
Supplement: Supplemental Information 4 [file peerj-12-16748-s004.xlsx]

## Sheet: Fig.A-B
NETS NO.	Sham	CLP	Dnase-1					DAPI			MPO			H3CIT			MERGED
	24	87	11
	13	17	18
	9	28	13
	21		15			SHAM
	24
	13
NETS/NUE	Sham	CLP	Dnase-1
	0.125	0.873563	0.272727
	0.076923	0.529412	0.111111
	0.111111	0.5	0.230769			CLP
	0.190476		0.2
	0.125
	0.076923
						DNASE-1

## Sheet: Fig.C
MPO	Sham	CLP	Dnase-1
	81.07	132.697	94.41
	58.42	129.76	92.93
	57.49	97.38	79.22
	83.95		88.72
	80.34
	66.77

## Sheet: Fig.D-E
	Sham	CLP	Dnase-1					SHAM				CLP				DNASE-1
	1.36	2.45	2.22
	1.64	2.18	1.47
	0.96	2.44	1.4
	1.14		1.76
	1.09
	1.05

## Sheet: Fig.F
ACSL4
GPX4
FTH
GAPDH

## Sheet: Fig.G
ACSL4		GPX4		FTH		GAPDH
1	5229.26	1	9536.5	1	7905.38	1	13984.9
2	4730.79	2	17835	2	7744.67	2	8697.96
3	3779.67	3	14058.4	3	14105.7	3	7401.98
4	6512.15	4	8112.45	4	16379.3	4	16606.5
5	13494.5	5	8179.79	5	14813.4	5	10348.8
6	19707.4	6	13541	6	13010.2	6	7638.15
7	17844.6	7	18241.6	7	4672.33	7	5870.33
8	12510.6	8	15162.6	8	6266.31	8	5958.23
9	10096.8	9	14131.5	9	8205.91	9	11481.4

## Sheet: Fig.H
GSH	Sham	CLP	Dnase-1	MDA	Sham	CLP	Dnase-1	FE	Sham	CLP	Dnase-1
	7.67	4.39369	8.28		4.29	13.29	4.5		2.08	10.81	2.84
	8.98	7.52963	8.94		4.03	8.24	3.44		1.15	11.9	2.18
	9.6	4.09962	9.29		3.59	9.65	4.08		2.03	7.61	2.32
	8.11		6.7		2.67		3.58		0.74		4.39
	9.08				2.38				1.32
	5.45				3.84				1.19
