# Supplementary material for: Mesenchymal stem cells alleviate sepsis-induced acute lung injury by blocking neutrophil extracellular traps formation and inhibiting ferroptosis in rats
Source: PeerJ. 2024 Jan 29;12:e16748. doi: 10.7717/peerj.16748 (PMC10832623; doi:10.7717/peerj.16748)
Supplement: Supplemental Information 5 [file peerj-12-16748-s005.xlsx]

## Sheet: Fig.A-B
PMEK/MEK	Sham	CLP	U0126	PERK/ERK	Sham	CLP	U0126
	0.312837	1.53937	1.24333		1.11	1.4	1.07		MEK1/2
	0.601119	1.5517	0.588482		0.51	1.98	0.32
	0.470644	1.19522	0.930299		0.77	1.2	0.28		PMEK1/2
									ERK1/2
									PERK1/2
									GAPDH

## Sheet: Fig.C-D
NETS NO.	Sham	CLP	U0126
	24	68	24						DAPI			MPO			H3CIT			MERGED
	13	85	21
	9	14	50
	21		51
	11						SHAM
	15
NETS/NEU	Sham	CLP	U0126
	0.13	0.54	0.125
	0.08	0.54	0.190476
	0.11	0.43	0.48
	0.19		0.431373				CLP
	0.272727
	0.2
							UO126

## Sheet: Fig.E
MPO	Sham	CLP	U0126
	67.95	133.49	85.23
	59.23	117.43	86.03
	84.61	85.51	69.78
	86.53		97.56
	79.87
	69.1
