# Supplementary material for: Mesenchymal stem cells alleviate sepsis-induced acute lung injury by blocking neutrophil extracellular traps formation and inhibiting ferroptosis in rats
Source: PeerJ. 2024 Jan 29;12:e16748. doi: 10.7717/peerj.16748 (PMC10832623; doi:10.7717/peerj.16748)
Supplement: Supplemental Information 6 [file peerj-12-16748-s006.xlsx]

## Sheet: Fig.A-B
histopathological score	Sham	CLP	U0126					Sham				CLP				UO126
	2	9	5.33
	2	10.67	5.33
	1.5	10.67	4.67
	1.5		3.67
	1.5
	2

## Sheet: Fig.C
W/D	Sham	CLP	U0126
	3.35	5.13	4.82
	3.91	5.08	4.79
	3.74	4.71	4.38
	3.78		4.55
	3.6
	3.42

## Sheet: Fig.D
TNF-A	Sham	CLP	U0126	IL-6	Sham	CLP	U0126
	94.43	147.67	115		57.97	114.84	70.18
	110.16	182.24	115.69		42.44	109.15	67.04
	119.73	170.73	109.1		42.55	81.19	58.8
	103.89		136.96		66.81		106.67
	73.11				64.59		90
	89.82				53.86

## Sheet: Fig.E
		SHAM					CLP				U0126

## Sheet: Fig.F
ACSL4
GPX4
FTH
GAPDH

## Sheet: Fig.G
ACSL4		GPX4		FTH		GAPDH
1	8849.84	1	12912.5	1	12901.6	1	8624.38
2	9094.86	2	13654.3	2	17448.7	2	8069.74
3	4023.62	3	6677.67	3	12376.9	3	6529.62
4	7016.03	4	5763.2	4	19452	4	11941.4
5	17842	5	4549.08	5	18940.7	5	17463.9
6	13819.3	6	11006.8	6	15799.6	6	8789.03
7	6891.03	7	9840.25	7	12057.9	7	8857.38
8	4989.5	8	10933.1	8	11077.1	8	5771.03
9	6386.26	9	16866.7	9	7821.2	9	14969.4

## Sheet: Fig.H
GSH	Sham	CLP	U0126	MDA	Sham	CLP	U0126	FE	Sham	CLP	U0126
	7.5504	4.06573	9.22652		5.08	14.65	3.7		1.2944	6.39635	1.23396
	9.90331	6.07996	9.96495		2.18	9.67	6.44		1.53211	7.04031	2.1664
	5.28702	3.28702	9.11466		1.46	13.07	4.72		1.16158	5.91389	1.6743
	6.50101		9.83899		3.15		8.13		1.13247		1.87753
	5.69597				4.37				0.686967
	8.555				6.29				0.79526
