# Supplementary material for: Mesenchymal stem cells alleviate sepsis-induced acute lung injury by blocking neutrophil extracellular traps formation and inhibiting ferroptosis in rats
Source: PeerJ. 2024 Jan 29;12:e16748. doi: 10.7717/peerj.16748 (PMC10832623; doi:10.7717/peerj.16748)
Supplement: Supplemental Information 7 [file peerj-12-16748-s007.xlsx]

## Sheet: Fig.A-B
PMEK/MEK	Sham	CLP	MSC	PERK/ERK	Sham	CLP	MSC
	0.202557	2.1636	1.0773		1.11	1.4	1.08		MEK1/2
	0.529558	1.45734	1.32596		0.51	1.98	1.04
	1.0181	1.34339	0.967166		0.77	1.2	0.46		PMEK1/2
									ERK1/2
									PERK1/2
									GAPDH

## Sheet: Fig.C-D
NETS NO.	Sham	CLP	MSC
	12	46	25						DAPI			MPO			H3CIT			MERGED
	8	67	18
	17	17	22
	22		15
	23						SHAM
	13
NETS/NEU	Sham	CLP	MSC
	0.11	0.4466	0.04
	0.06	0.573563	0.06
	0.13	0.529412	0.36
	0.22		0.2				CLP
	0.28
	0.19
							MSC

## Sheet: Fig.E
MPO	Sham	CLP	MSC
	68.05	132.87	51.78
	60.11	112.59	57.81
	83.32	86.78	77.24
	86.67		98.6
	80.43		83.41
	68.2
