# Supplementary material for: Mesenchymal stem cells alleviate sepsis-induced acute lung injury by blocking neutrophil extracellular traps formation and inhibiting ferroptosis in rats
Source: PeerJ. 2024 Jan 29;12:e16748. doi: 10.7717/peerj.16748 (PMC10832623; doi:10.7717/peerj.16748)
Supplement: Supplemental Information 8 [file peerj-12-16748-s008.xlsx]

## Sheet: Fig.A
		SHAM					CLP				U0126

## Sheet: Fig.B
ACSL4
GPX4
FTH
GAPDH

## Sheet: Fig.C
ACSL4		GPX4		FTH		GAPDH
1	10911.2	1	17659.4	1	12140	1	18778.2
2	8158.13	2	13292.7	2	12322.7	2	15464.5
3	11709	3	11117.4	3	12763.8	3	11356.8
4	9874.5	4	6254.91	4	10963.6	4	12957.9
5	9379.72	5	6019.96	5	10550.4	5	10867.1
6	17810.7	6	7766.67	6	12320	6	11446.8
7	12159.3	7	9692.45	7	12928.2	7	11462.9
8	11314.1	8	12107.3	8	13025.3	8	10810.2
9	8432.84	9	13138.5	9	18147.3	9	16444.2

## Sheet: Fig.D
GSH	Sham	CLP	MSC	MDA	Sham	CLP	MSC	FE	Sham	CLP	MSC
	7.2356	5.06329	9.78552		5.08	13.45	3.03		1.2944	6.40122	1.48679
	6.4325	4.02532	7.29479		2.18	8.99	10.4		1.53211	7.12034	1.04849
	5.31086	5.75089	9.3147		1.46	14.23	5.51		1.16158	6.19836	1.48587
	9.89021		9.75004		3.15		2.46		1.13247		1.34066
	5.70346		8.5504		4.37		9.67		0.686967		0.89152
	8.50215				6.29				0.79526

## Sheet: Fig.E-F
histopathological score	Sham	CLP	MSC					Sham				CLP					MSC
	1.5	11	3.5
	1.5	10.33	5.33
	2	9	7.33
	2		4
	1.5		2
	2

## Sheet: Fig.G
W/D	Sham	CLP	MSC
	3.33	5.2	4.39
	3.9	4.99	4.34
	3.72	4.73	4.63
	3.69		4.37
	3.62		4.69
	3.51

## Sheet: Fig.H
TNF-A	Sham	CLP	MSC	IL-6	Sham	CLP	MSC
	92.77	146.89	79.16		54.69	115.13	40.23
	108.23	183.01	77.59		46.24	102.15	45.88
	118.97	165.13	99.76		41.55	82.76	42.96
	105.87		148.04		64.87		57.74
	75.13		159.63		68.78		82.42
	81.18				52.87
