# Supplementary material for: Mesenchymal stem cells alleviate sepsis-induced acute lung injury by blocking neutrophil extracellular traps formation and inhibiting ferroptosis in rats
Source: PeerJ. 2024 Jan 29;12:e16748. doi: 10.7717/peerj.16748 (PMC10832623; doi:10.7717/peerj.16748)
Supplement: Supplemental Information 19 [file peerj-12-16748-s019.xlsx]

## Sheet: Fig.A
Sham	CLP
0.72	1.76
1.09	2.18
1.05	2.44
1.18
0.96
0.86

## Sheet: Fig.B
Sham	CLP	Fer-1
0.85972	2.42682	1.753
1	2.55383	1.97703
1.54172	2.67893	1.97703
1.38976		2.04334
1.63857
1.46606

## Sheet: Fig.C
Sham	CLP	Dnase-1
1.36	2.45	2.22
1.64	2.18	1.47
0.96	2.44	1.4
1.14		1.76
1.09
1.05

## Sheet: Fig.D
Sham	CLP	U0126
1.67	2.55	2
1.67	2.54	2.16
1.54	2.01	2.28
0.72		1.76
1.18
1.43

## Sheet: Fig.E
Sham	CLP	MSC
1.67	2.55	1.79
1.67	2.54	1.52
1.54	2.01	1.54
0.72		2.07
1.18		1.86
1.43

## Sheet: Fig.F
		SHAM
		CLP
		DNASE-1
		Fer-1
