# Supplementary material for: Mesenchymal stem cells alleviate sepsis-induced acute lung injury by blocking neutrophil extracellular traps formation and inhibiting ferroptosis in rats
Source: PeerJ. 2024 Jan 29;12:e16748. doi: 10.7717/peerj.16748 (PMC10832623; doi:10.7717/peerj.16748)
Supplement: Supplemental Information 20 [file peerj-12-16748-s020.xlsx]

## Sheet: Fig.B
control
pma

## Sheet: Fig.C
		dapi				cit-h3				mpo				merge
control
pma

## Sheet: Fig.D
DMSO	PMA-6h	PMA-24h	LPS-6h	LPS-24h
8.7	13.4	3.8	13.6	2.5
9.1	14.8	4.1	14	2.8
8.8	13.5	3.9	13.7	2.6

## Sheet: Fig.E
DMSO	PMA-6h	PMA-24h	LPS-6h	LPS-24h
4.4	14.1	9	4	7.2
6.9	10.6	9.7	4.7	6.8
4.6	11.2	9.2	4.2	6.9
