# Supplementary material for: Mesenchymal stem cells alleviate sepsis-induced acute lung injury by blocking neutrophil extracellular traps formation and inhibiting ferroptosis in rats
Source: PeerJ. 2024 Jan 29;12:e16748. doi: 10.7717/peerj.16748 (PMC10832623; doi:10.7717/peerj.16748)
Supplement: Supplemental Information 21 [file peerj-12-16748-s021.xlsx]

## Sheet: Fig.C
Time	PBS	MPO	NE	Histone	cfDNA
0	0.151	0.162	0.155	0.157	0.154
12	0.596	0.4795	0.452	0.233	0.2785
24	0.8185	0.7655	0.7565	0.5265	0.634

## Sheet: Fig.D
ACSL4
GPX4
FTH
GAPDH

## Sheet: Fig.E
ACSL4		GPX4		FTH		GAPDH
1	7300.57	1	22859.8	1	14635.7	1	22727.8
2	11652.2	2	15963.7	2	26018.2	2	25627.6
3	11286.1	3	12339.2	3	22004.6	3	19865
4	5911.1	4	15726.1	4	27774.4	4	17554.4
5	4864.59	5	11622.5	5	16692.1	5	19294.1
6	23653	6	20487.8	6	5443.37	6	24640
